# Supplementary material
Source: PubMed Central journal article supplement (PMC2519710)
Supplement: supp_28_16_5106__1.pdf [file supp_28_16_5106__1.pdf]

SUPPLEMENTAL TABLES

**Table S1. Relative catalase and GPx activity for specific cells and tissues. One unit of catalase activity is defined as the amount of enzyme that decomposes 1 mmol H<sub>2</sub>O<sub>2</sub>/min. One unit of GPx activity is defined as  $\mu$ mol NADPH oxidized/min. Cited references describe the methods used for determining enzyme activity in each study. To aid comparisons, values are grouped together by study (shading) and tissue/tumor type.**

| <b>Tissue/Tumor Type</b> | <b>Cell Line<br/>Or Tissue</b>       | <b>k<sub>catalase</sub><br/>(U/g protein)</b> | <b>k<sub>GPx</sub><br/>(U/g protein)</b> | <b>Reference</b> |
|--------------------------|--------------------------------------|-----------------------------------------------|------------------------------------------|------------------|
| Glioma                   | A172                                 | 3.7 ± 1.3                                     | 5.3 ± 0.6                                | (105)            |
| Glioma                   | D54                                  | 6.4 ± 0.3                                     | 7.6 ± 0.7                                | (105)            |
| Glioma                   | U87                                  | 5.0 ± 0.4                                     | 16.3 ± 1.3                               | (105)            |
| Glioma                   | U118                                 | 5.8 ± 1.0                                     | 8.6 ± 0.7                                | (105)            |
| Glioma                   | U251                                 | 20.9 ± 1.3                                    | 8.9 ± 2.6                                | (105)            |
| Glioma                   | U563                                 | 17.9 ± 2.2                                    | 6.4 ± 0.8                                | (105)            |
| Glioma                   | A172R                                | 3.9 ± 0.7                                     | 10.0 ± 0.9                               | (105)            |
| Glioma                   | RG                                   | 16.3 ± 5.1                                    | 2.0 ± 0.6                                | (105)            |
| Glioma                   | N89-441R                             | 12.3 ± 3.2                                    | 6.0 ± 2.5                                | (105)            |
| Glioma                   | C6                                   | 11.8 ± 0.4                                    | 40 ± 4                                   | (60)             |
| Glioma                   | Human GBM                            | N.M.                                          | 17.71 ± 3.9<br>(U/g wet tissue)          | (92)             |
| Normal Brain             |                                      | N.M.                                          | 45.3 ± 6.9<br>(U/g wet tissue)           | (92)             |
| Hepatoma                 | Human<br>hepatocellular<br>carcinoma | 99 ± 5                                        | N.M.                                     | (11)             |
| Normal Liver             |                                      | 339 ± 12                                      | N.M.                                     | (11)             |
| Hepatoma                 | HepG2                                | 33 ± 3                                        | N.M.                                     | (23)             |
| Hepatoma                 | Hepa 1-6                             | 20 ± 1                                        | N.M.                                     | (59)             |
| Normal Liver             |                                      | 99 ± 12                                       | N.M.                                     | (59)             |
| Colon Carcinoma          | CT26                                 | 35 ± 2                                        | N.M.                                     | (59)             |
| Normal Colon             |                                      | 43 ± 2                                        | N.M.                                     | (59)             |
| Fibroblasts              | NIH 3T3                              | 72 ± 5                                        | N.M.                                     | (59)             |

**Table S2. Experimental observations for relative HIF1 $\alpha$  expression and accumulation over time in chronic conditions of hypoxia (top) and in chronic conditions associated with ischemia or reperfusion (below).**

| Cell/Tissue type                                    | Time to max. HIF1 $\alpha$ (hrs of hypoxia) | O <sub>2</sub>             | Measured duration of elevated HIF1 $\alpha$                                                                     | Reference |
|-----------------------------------------------------|---------------------------------------------|----------------------------|-----------------------------------------------------------------------------------------------------------------|-----------|
| Cervical cancer, HeLa                               | 4                                           | 1%                         | Over 7 days, loss greatest in first 48 hrs                                                                      | (35)      |
| Fibrosarcoma, HT1080                                | 4                                           | 1%                         | Over 7 days, loss greatest in first 72 hrs                                                                      | (35)      |
| Prostate carcinoma, DU145                           | 1                                           | 1%                         | Elevated HIF1 $\alpha$ for 4-8 hrs                                                                              | (52)      |
| Renal cell carcinoma (overexpressing VHL) RCC4-pVHL | 4                                           | 1%                         | Over 4 days, loss greatest in first 24 hrs                                                                      | (35)      |
| Glioblastoma, U87MG                                 | no max detected                             | 0.2%, 2%                   | 1 h to 18 hrs                                                                                                   | (97)      |
| Embryonic kidney, HEK293                            | 4                                           | 1%                         | Over 5 days, loss greatest in first 72 hrs                                                                      | (35)      |
| Embryonic kidney, HEK293                            | 4 to 8                                      | 1%                         | Over 3 days, loss greatest after 8 hrs                                                                          |           |
| Lung fibroblasts, CCL39                             | 4                                           | 1%                         | Over 7 days, loss greatest in first 48 hrs                                                                      | (35)      |
| Dermal fibroblasts, NHF                             | 4                                           | 1%                         | Over 7 days, loss greatest in first 72 hrs                                                                      | (35)      |
| Rat cortical samples                                | 6                                           | 10% (live rats)            | Over 21 days, 9x-10x elevated HIF1 $\alpha$ at 6 hrs, 12 hrs, 1 day, 4 days; 5x HIF1 $\alpha$ at 7 and 14 days. | (28)      |
| Mice whole brain, nuclear extracts                  | 3                                           | 8% (live mice)             | Over 6 hrs                                                                                                      | (14)      |
| Cell/Tissue Type                                    | Time to max. HIF1 $\alpha$ (hrs)            | Condition                  | Measured duration of elevated HIF1 $\alpha$                                                                     | Reference |
| Rat cortical samples                                | 1 to 24                                     | N.M.; ischemia, 11-13 min  | Over 7 days, highest HIF1 $\alpha$ levels between 1 hr and 1 day                                                | (29)      |
| Squamous cell carcinoma, 22B                        | no max reached                              | addition of 10 mM pyruvate | Increasing HIF1 $\alpha$ levels from 2 to 24 hrs                                                                | (63)      |
| Coculture, neurons and astrocytes                   | 0                                           | reoxygenation              | HIF1 $\alpha$ levels returned to baseline by 6 hrs reoxygenation                                                | (95)      |
| Rat basal ganglia                                   | 72                                          | blood injection            | 4 hrs to 7 days, peak at 3 days                                                                                 | (51)      |

## SUPPLEMENTAL FIGURE LEGENDS

**Supplemental Figure 1.** HIF1 $\alpha$  levels vs. time for cells in the presence or (hypothetical) absence of ROS, where ROS is represented by changes in Fe<sup>2+</sup> and Asc or 2OG concentrations. ROS may be represented by a decrease (dotted line) or increase (dashed line) in [Fe<sup>2+</sup>]<sub>0</sub> and [Asc]<sub>0</sub> or [2OG]<sub>0</sub>. [HIF1 $\alpha$ ]<sub>0</sub> = 1  $\mu$ M. (A) HIF1 $\alpha$  levels vs. time for cells exposed to ROS, compared to cells without ROS effects. Values are normalized to the maximum [HIF1 $\alpha$ ]<sub>unhydroxylated</sub> for each condition. (B) Absolute HIF1 $\alpha$  levels vs. time for cells exposed to ROS, where ROS is represented by changes in [Fe<sup>2+</sup>]<sub>0</sub> and [2OG]<sub>0</sub>. (C) HIF1 $\alpha$  levels vs. time in tumors with SDH deficiency, where [SC]<sub>0</sub>:[PHD2]<sub>0</sub> = 500. Values are normalized to the maximum [HIF1 $\alpha$ ]<sub>unhydroxylated</sub> for each condition. (D) Absolute HIF1 $\alpha$  levels vs. time in tumors with SDH deficiency, where [SC]<sub>0</sub>:[PHD2]<sub>0</sub> = 500. The time step used was 12 seconds; the peaks in [HIF1 $\alpha$ ]<sub>unhydroxylated</sub> for the [SC]<sub>0</sub>:[PHD2]<sub>0</sub> = 500:1 in (B), (C) and (D) last for ~1 min. The ratio of [SC]<sub>0</sub>:[PHD2]<sub>0</sub> = 500 was used to represent maximum values found in vitro here, while main Figure 2C showed hypothetical SDH deficiency conditions in vivo, where [SC]<sub>0</sub>:[PHD2]<sub>0</sub> = 5. Further details of this representation can be found in reference (78).

**Supplemental Figure 2.** (A) Model results show the effects of H<sub>2</sub>O<sub>2</sub> on cellular hypoxic response via HIF1 $\alpha$  expression from 0 to 144 hours (6 days) in tumor cells exposed to ROS and tumor cells with succinate effects modeled by signaling O<sub>2</sub> depletion. Conditions correspond to those detailed in Table 2. For the succinate O<sub>2</sub>-depletion model, [SC]<sub>0</sub> = 5.0  $\mu$ M; k<sub>SC</sub> = 0.001 min<sup>-1</sup>. [HIF1 $\alpha$ ]<sub>0</sub> = 1  $\mu$ M. (B) Cumulative concentration of H<sub>2</sub>O<sub>2</sub> produced, transported and metabolized for a tumor cell over 72 hours. Negative values refer to loss of H<sub>2</sub>O<sub>2</sub>. The

intracellular concentration of  $\text{H}_2\text{O}_2$  rapidly reached an equilibrium level of  $0.25 \mu\text{M}$  from  $[\text{H}_2\text{O}_2] = 0.2 \mu\text{M}$  ( $< 1 \text{ min}$ ).

**Supplemental Figure 3.** Model results show the effects of  $\text{H}_2\text{O}_2$  on cellular hypoxic response via HIF1 $\alpha$  expression in ischemic cells, ischemic cells exposed to ROS generated by reperfusion in constant hypoxia, and ischemic cells exposed to reperfusion in hypothetical normoxic conditions for 0-12 hrs (A) and 0-72 hrs (B). Reperfusion would likely produce intermediate HIF1 $\alpha$  expression levels between those shown for constant normoxia and constant hypoxia.  $[\text{HIF1}\alpha]_0 = 1 \mu\text{M}$ . (C) Long-term expression of HIF1 $\alpha$  in ischemic cells, and ischemic cells exposed to ROS generated by reperfusion, where ROS is represented both by  $\text{H}_2\text{O}_2$  and an increase in  $\text{Fe}^{2+}$  and Asc. See Figure 6A, for the same conditions, shown from 0-12 hrs. (D) Cumulative change in  $[\text{H}_2\text{O}_2]$  due to production, transport and metabolism for the conditions of ischemia with reperfusion, in hypoxia.  $\sim 20 \text{ mM}$   $[\text{H}_2\text{O}_2]$  total was produced (compared to  $\sim 36 \text{ mM}$  in a tumor cell for 72 hrs), while the graph shows the significance of transport and metabolism. The corresponding  $\text{H}_2\text{O}_2$  intracellular concentration level reached a value near  $2.0 \mu\text{M}$ , for all times  $> 30$  minutes (see Supplemental Figure 4A). Ischemia and reperfusion conditions correspond to those detailed in Table 2.

**Supplemental Figure 4.** (A) Model results show the effect of  $[\text{H}_2\text{O}_2]_{\text{extracellular}}$  on HIF1 $\alpha$  levels over time in the model's default case representing tumor conditions. (B) Relative expression of HIF1 $\alpha$  in the model (diamonds) is compared to experiments measuring relative HIF1 activation through luciferase activity as a function of different  $\text{H}_2\text{O}_2$  concentrations that were added to the media of cultured HepG2 (human hepatocarcinoma) cells [14] (bars). The experiments

supplemented the media with 2 nM of insulin, expect for the indicated initial value with no added H<sub>2</sub>O<sub>2</sub> (- Ins). Results from the experiments and the model were scaled relative to their maximum increase in luciferase activity or HIF1 $\alpha$  expression, respectively.

Supplemental Figure 1.

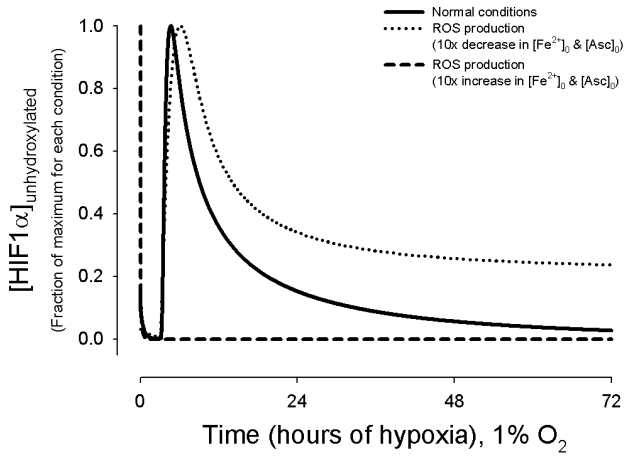

A

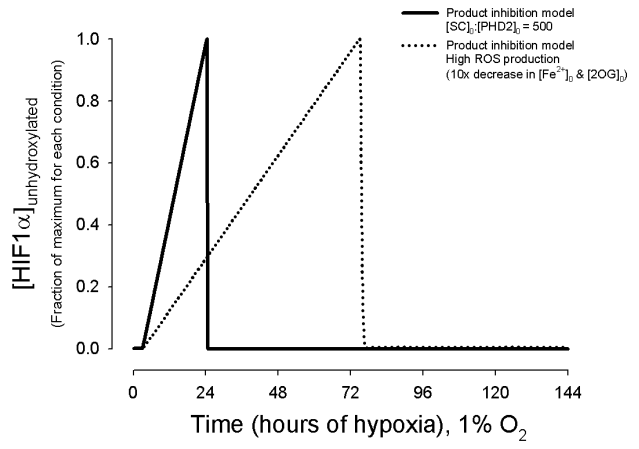

B

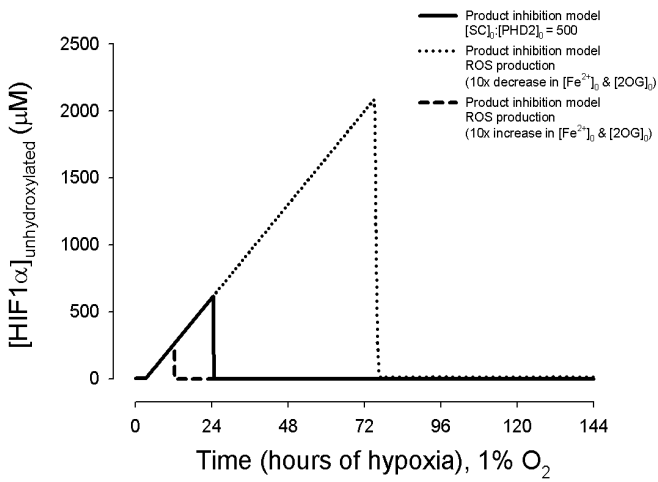

C

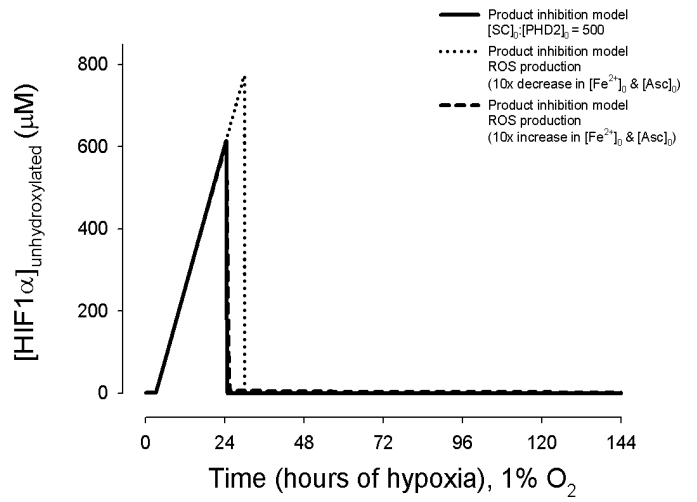

D

Supplemental Figure 2.

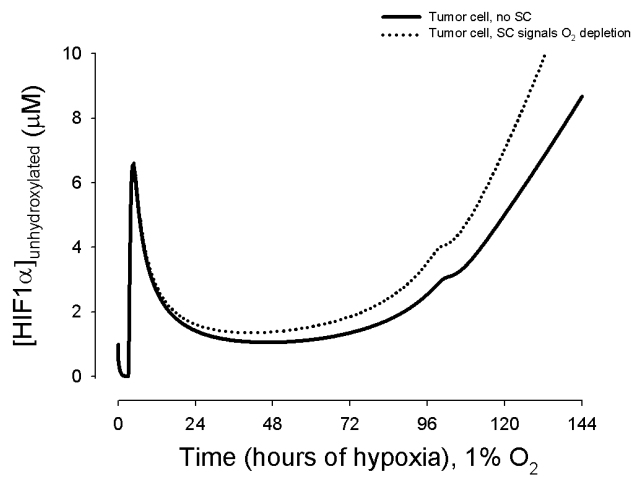

A

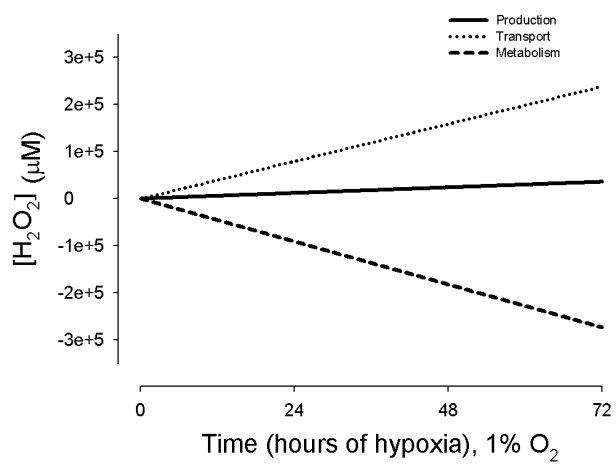

B

Supplemental Figure 3.

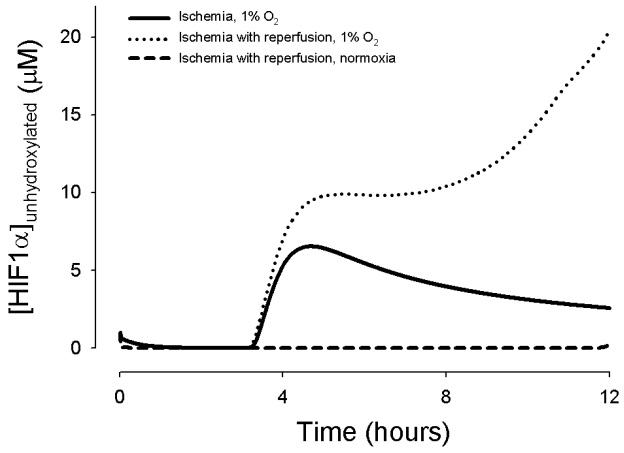

A

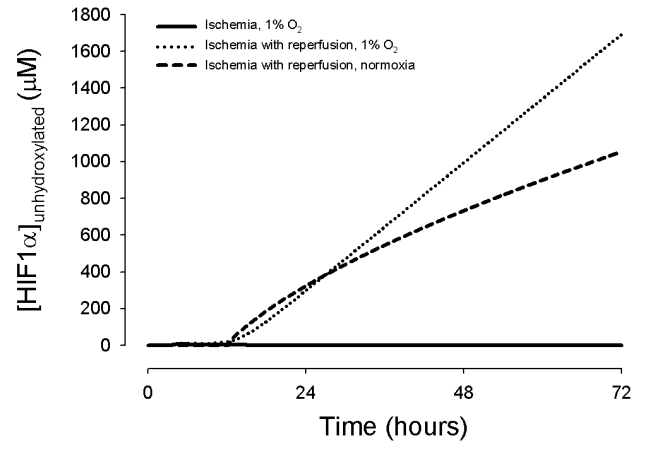

B

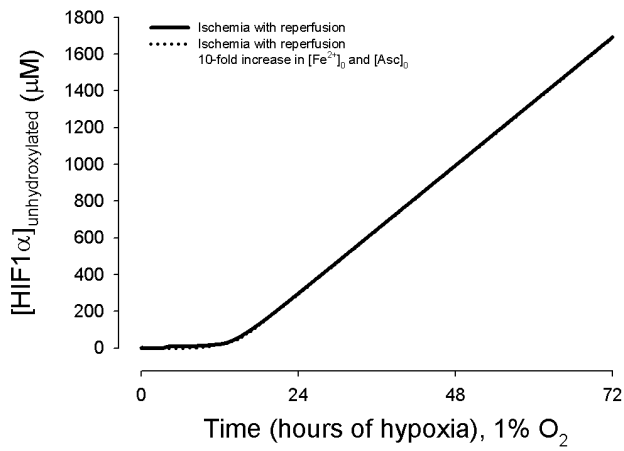

C

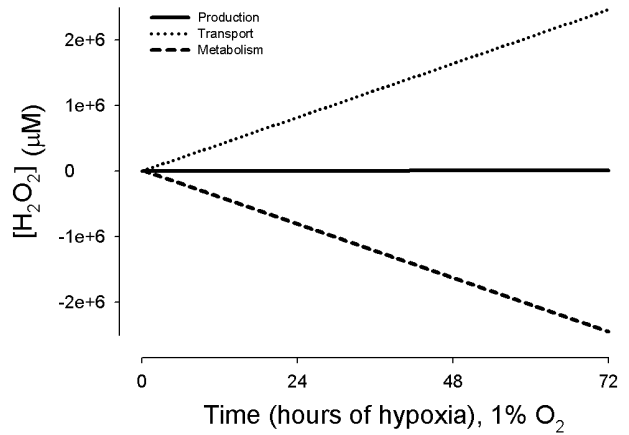

D



Supplemental Figure 4.

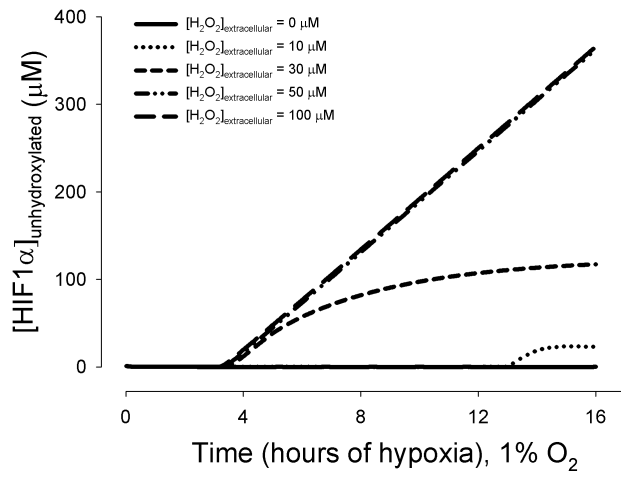

A

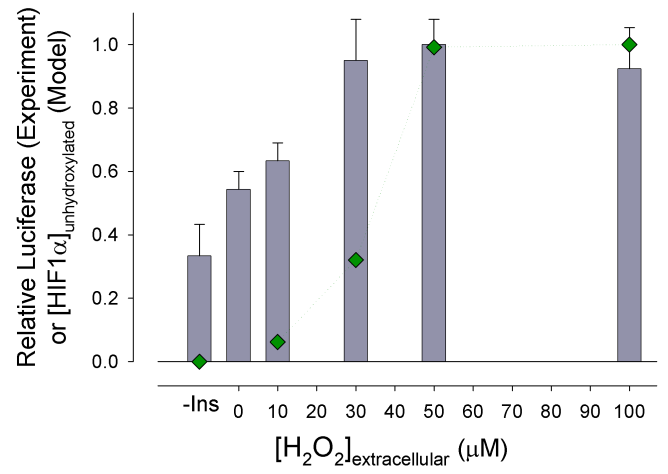

B
